# Supplementary material
Source: publisher figshare collection journal article supplement (https://sage.figshare.com/ndownloader/files/23727632)
Supplement: Supplementary file 1 [file 23727632]

## **List of supplemental materials**

1. Title - Interview protocol – Supplemental materials for article Tactile perception by mouth: Perceiving properties of objects when vision is impaired; Description: interview questions and instructions – Supplemental material for Tactile perception by mouth: Perceiving properties of objects when vision is impaired by Urqueta, A., Walker, L., Lee, C., Lei, D. in British Journal of Visual Impairment.
  
2. Title – Reliability results – Supplemental materials for article Tactile perception by mouth: Perceiving properties of objects when vision is impaired; Description: table of reliability results – Supplemental material for Tactile perception by mouth: Perceiving properties of objects when vision is impaired by Urqueta, A., Walker, L., Lee, C., Lei, D. in British Journal of Visual Impairment.
